# Supplementary material
Source: publisher figshare collection journal article supplement (https://acs.figshare.com/ndownloader/files/17502212)

Supporting Information

## Prediction and Experimental Confirmation of Novel Peripheral Cannabinoid-1 Receptor Antagonists

Shayma El-Atawneh<sup>1,#</sup>, Shira Hirsch<sup>2,#</sup>, Rivka Hadar<sup>2</sup>, Joseph Tam<sup>2,\*</sup>, Amiram Goldblum<sup>1,\*</sup>

<sup>1</sup>Molecular Modeling Laboratory; <sup>2</sup>Obesity and Metabolism Laboratory, Institute for Drug Research, School of Pharmacy, Faculty of Medicine, The Hebrew University of Jerusalem, Jerusalem 9112001, Israel

# These authors contributed equally to this work

\* Address correspondence to: Joseph Tam, [yossit@ekmd.huji.ac.il](mailto:yossit@ekmd.huji.ac.il); Amiram Goldblum, [amiramg@ekmd.huji.ac.il](mailto:amiramg@ekmd.huji.ac.il)

Table S1 – Ranges of properties of the learning sets

| Dataset               | Molecular weight | cLogP   | Hydrogen acceptors | Hydrogen donors |
|-----------------------|------------------|---------|--------------------|-----------------|
| IC <sub>50</sub> data | 199-732          | 0.6-9.4 | 1-12               | 0-6             |
| K <sub>i</sub> data   | 258-1097         | 0.5-17  | 1-11               | 0-6             |

Figure S1 – Appearance of descriptors types of the models A-D

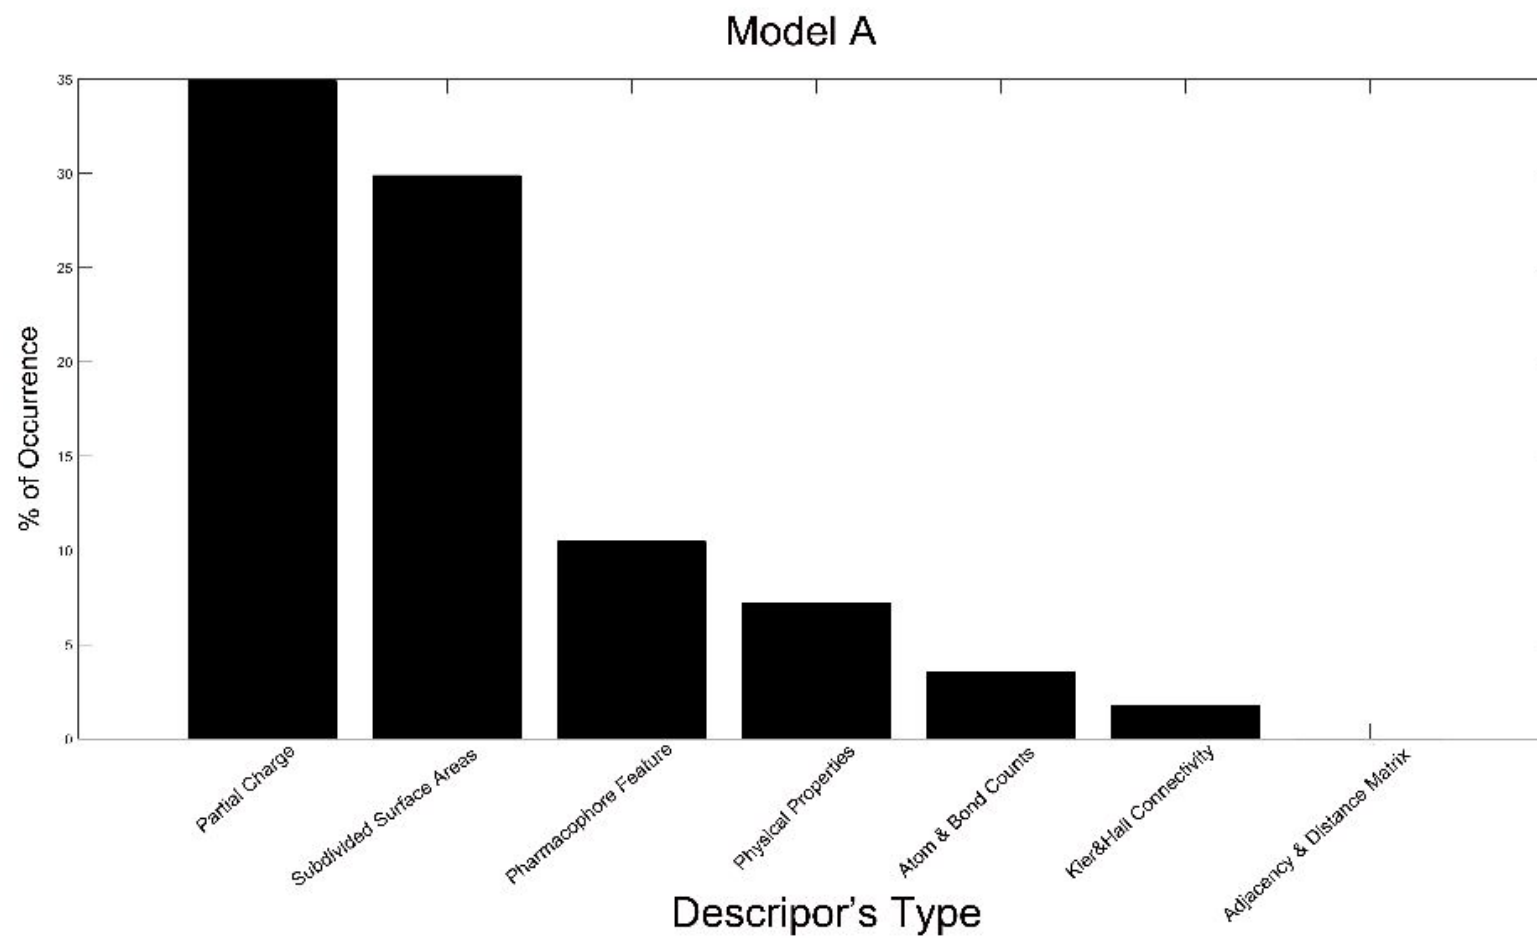

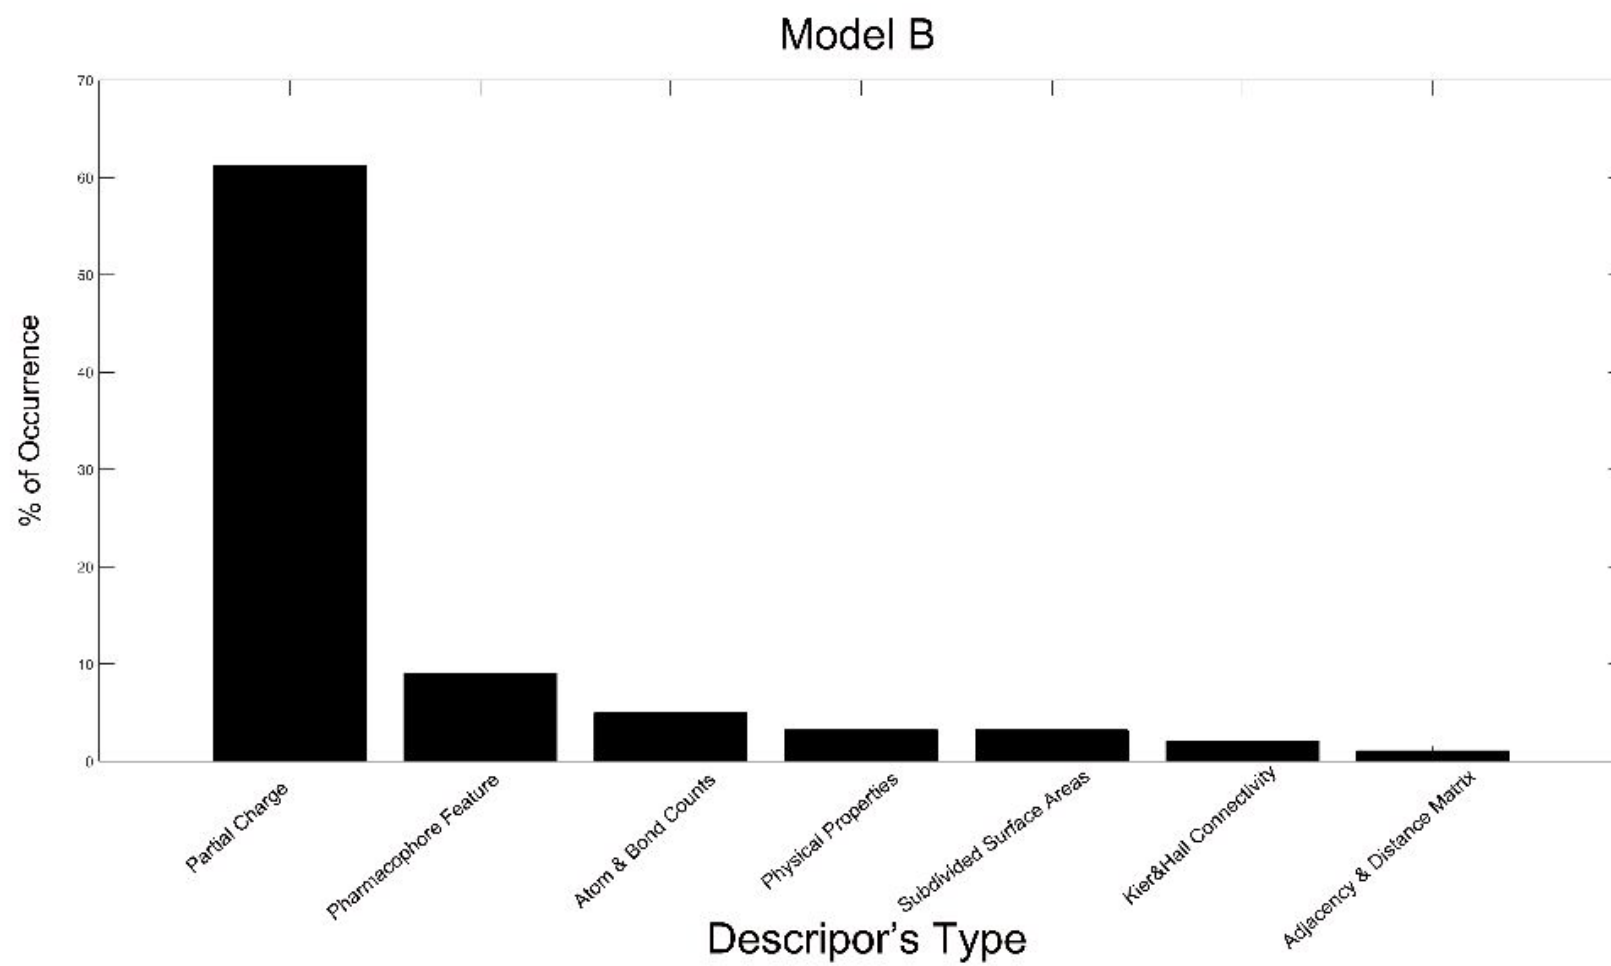

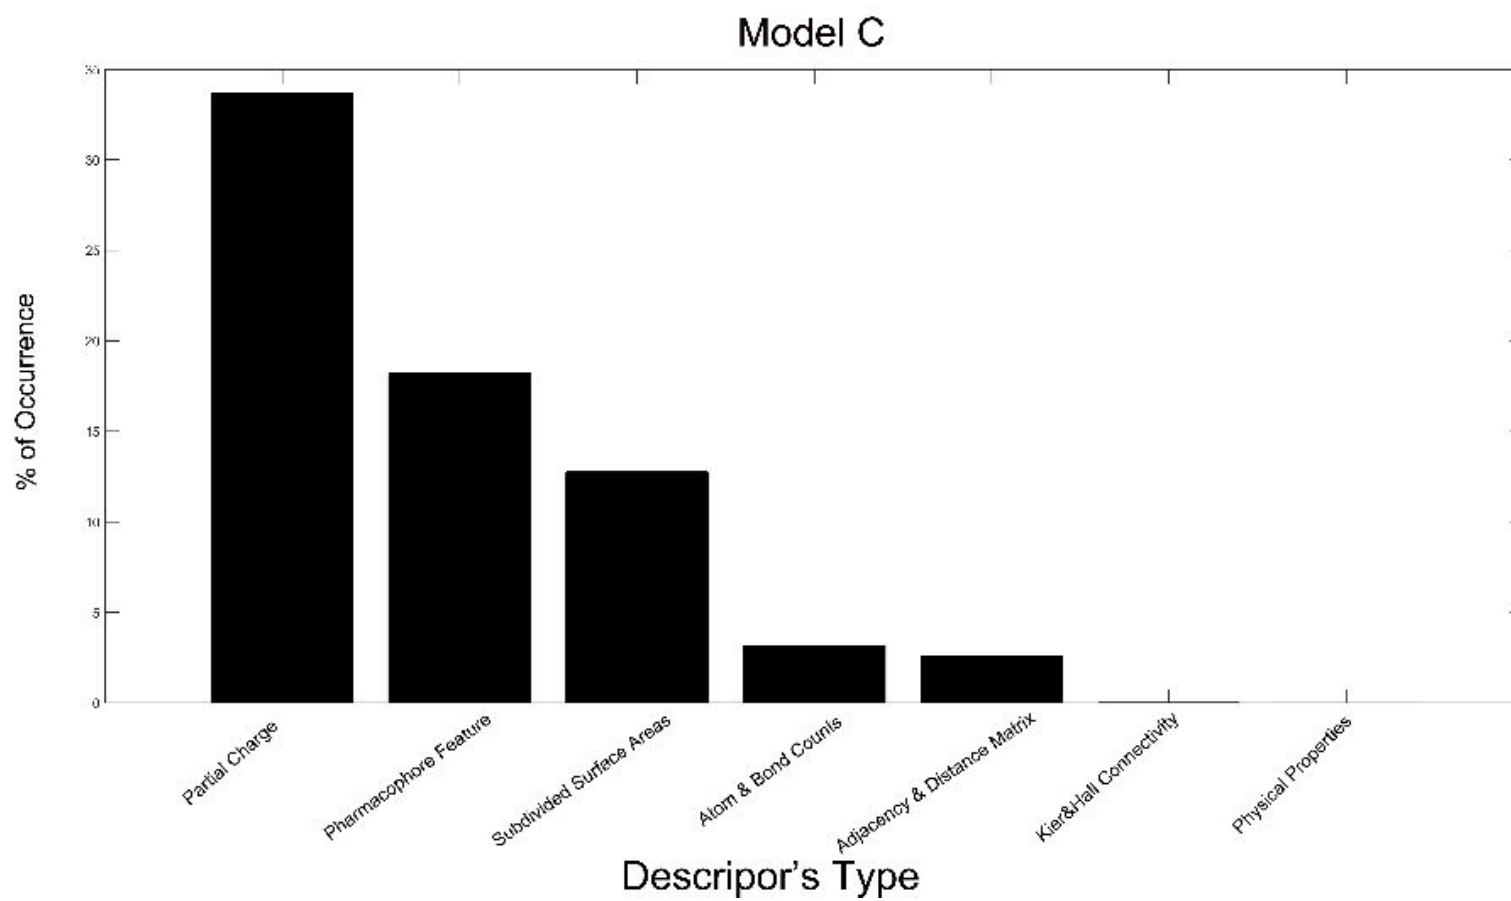

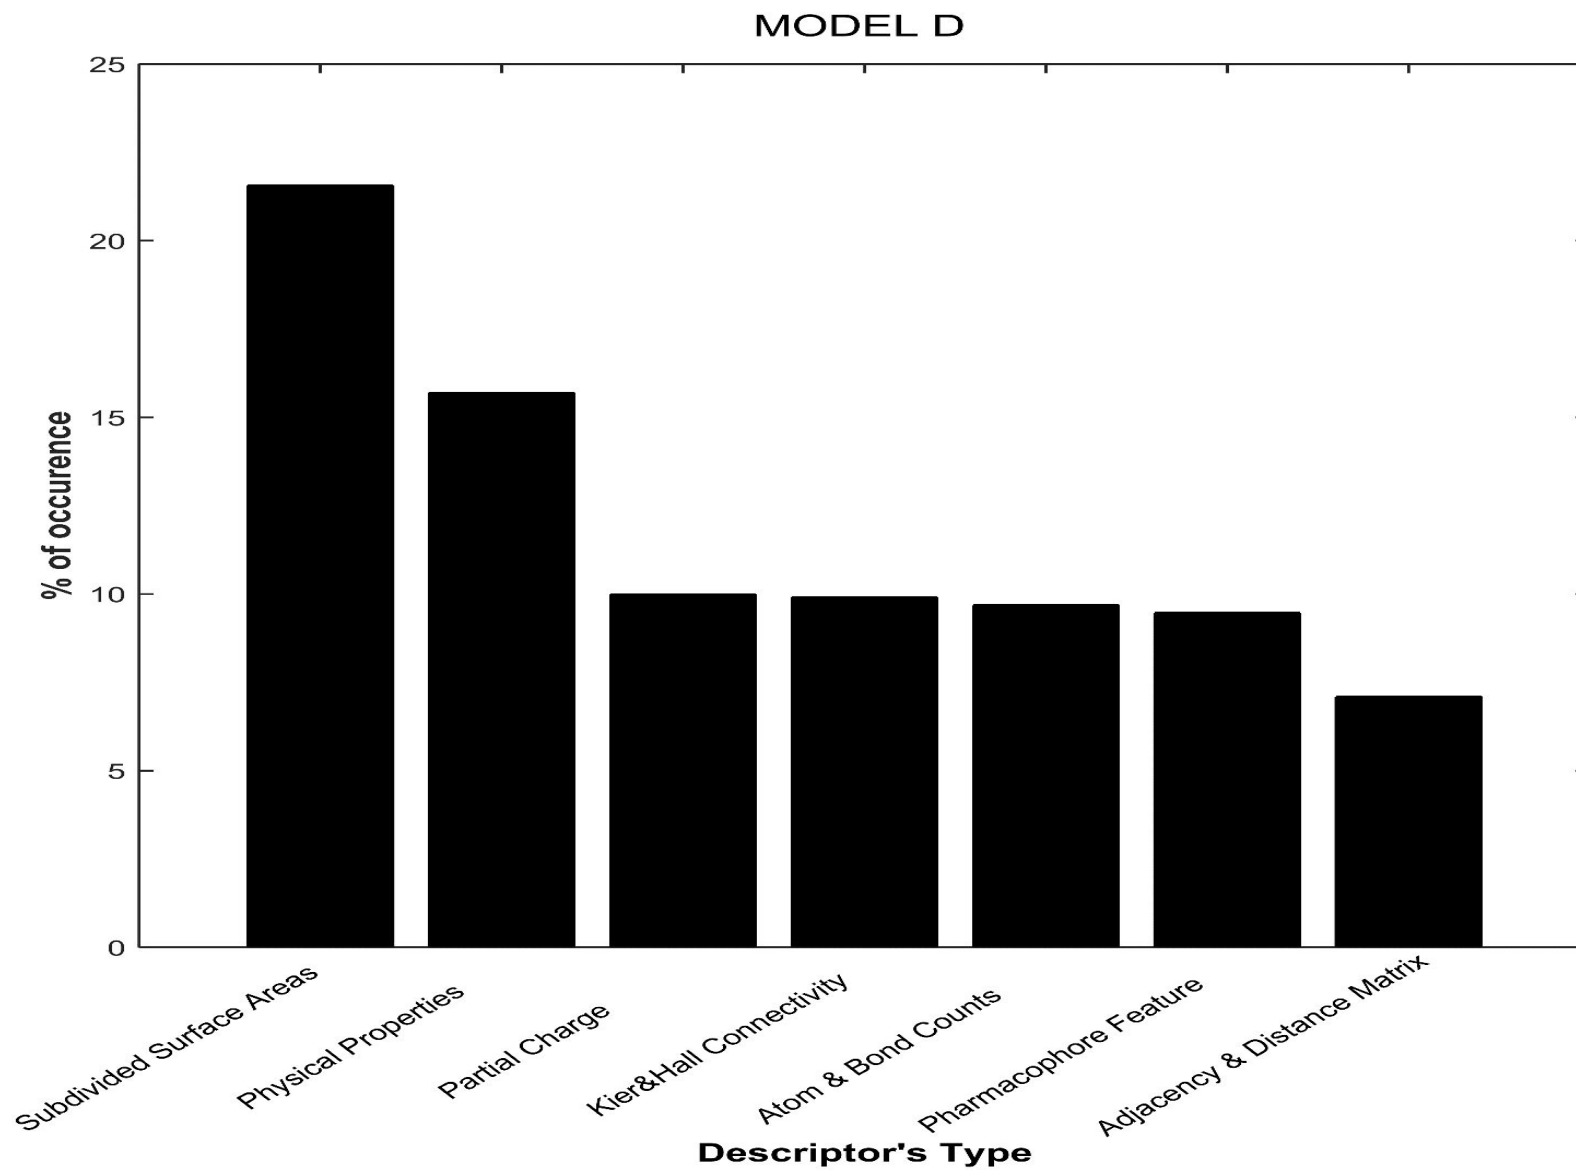

Figure S2 – Scatter plots for the actives and randoms in models A-D

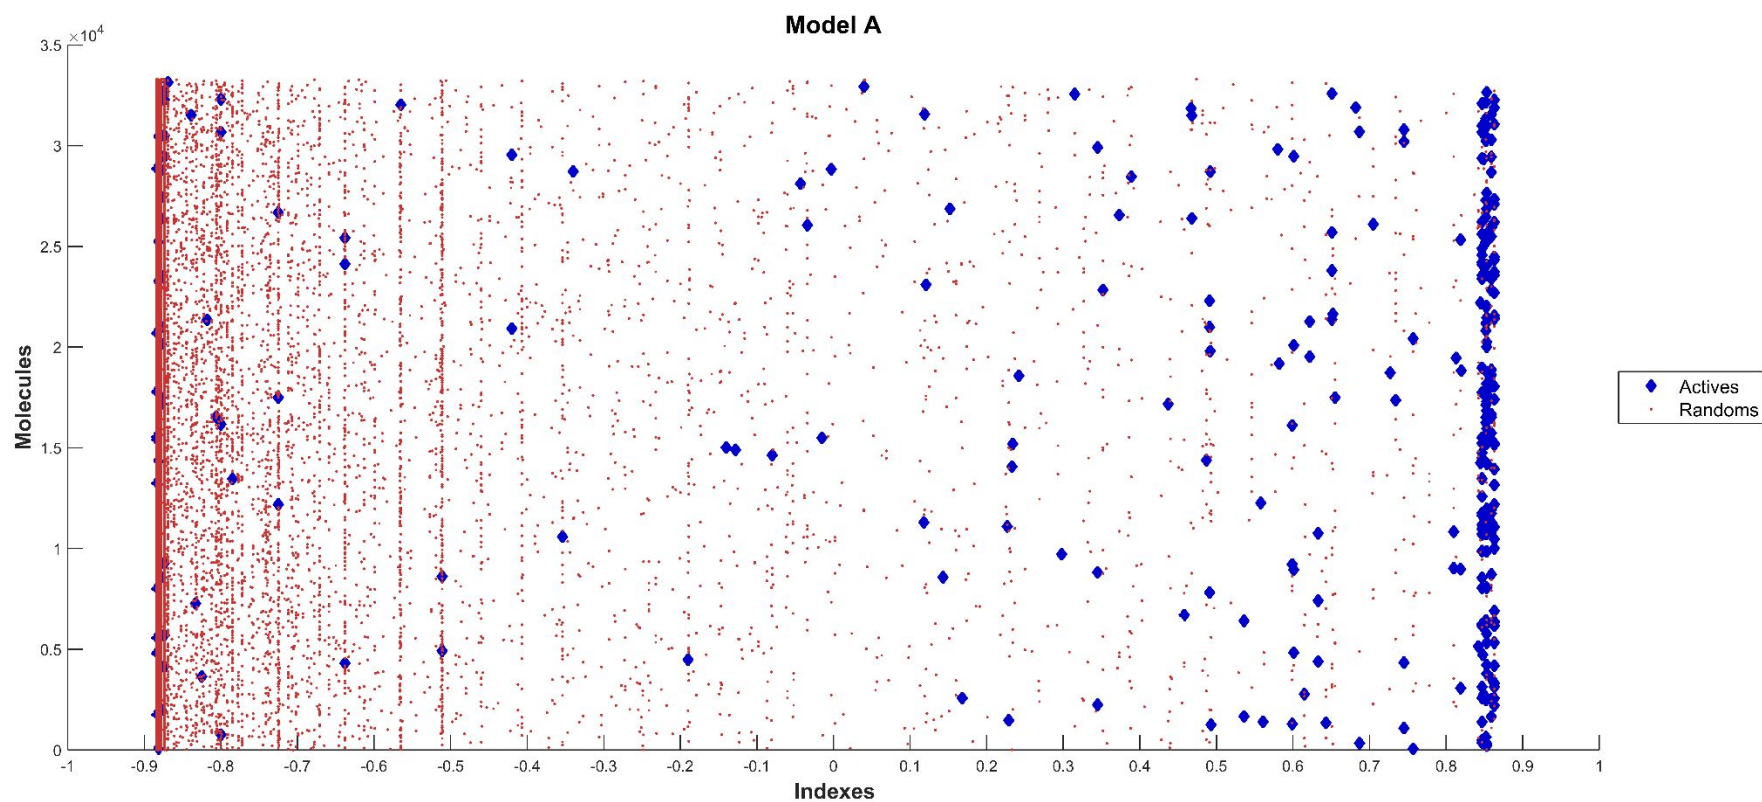

Model B

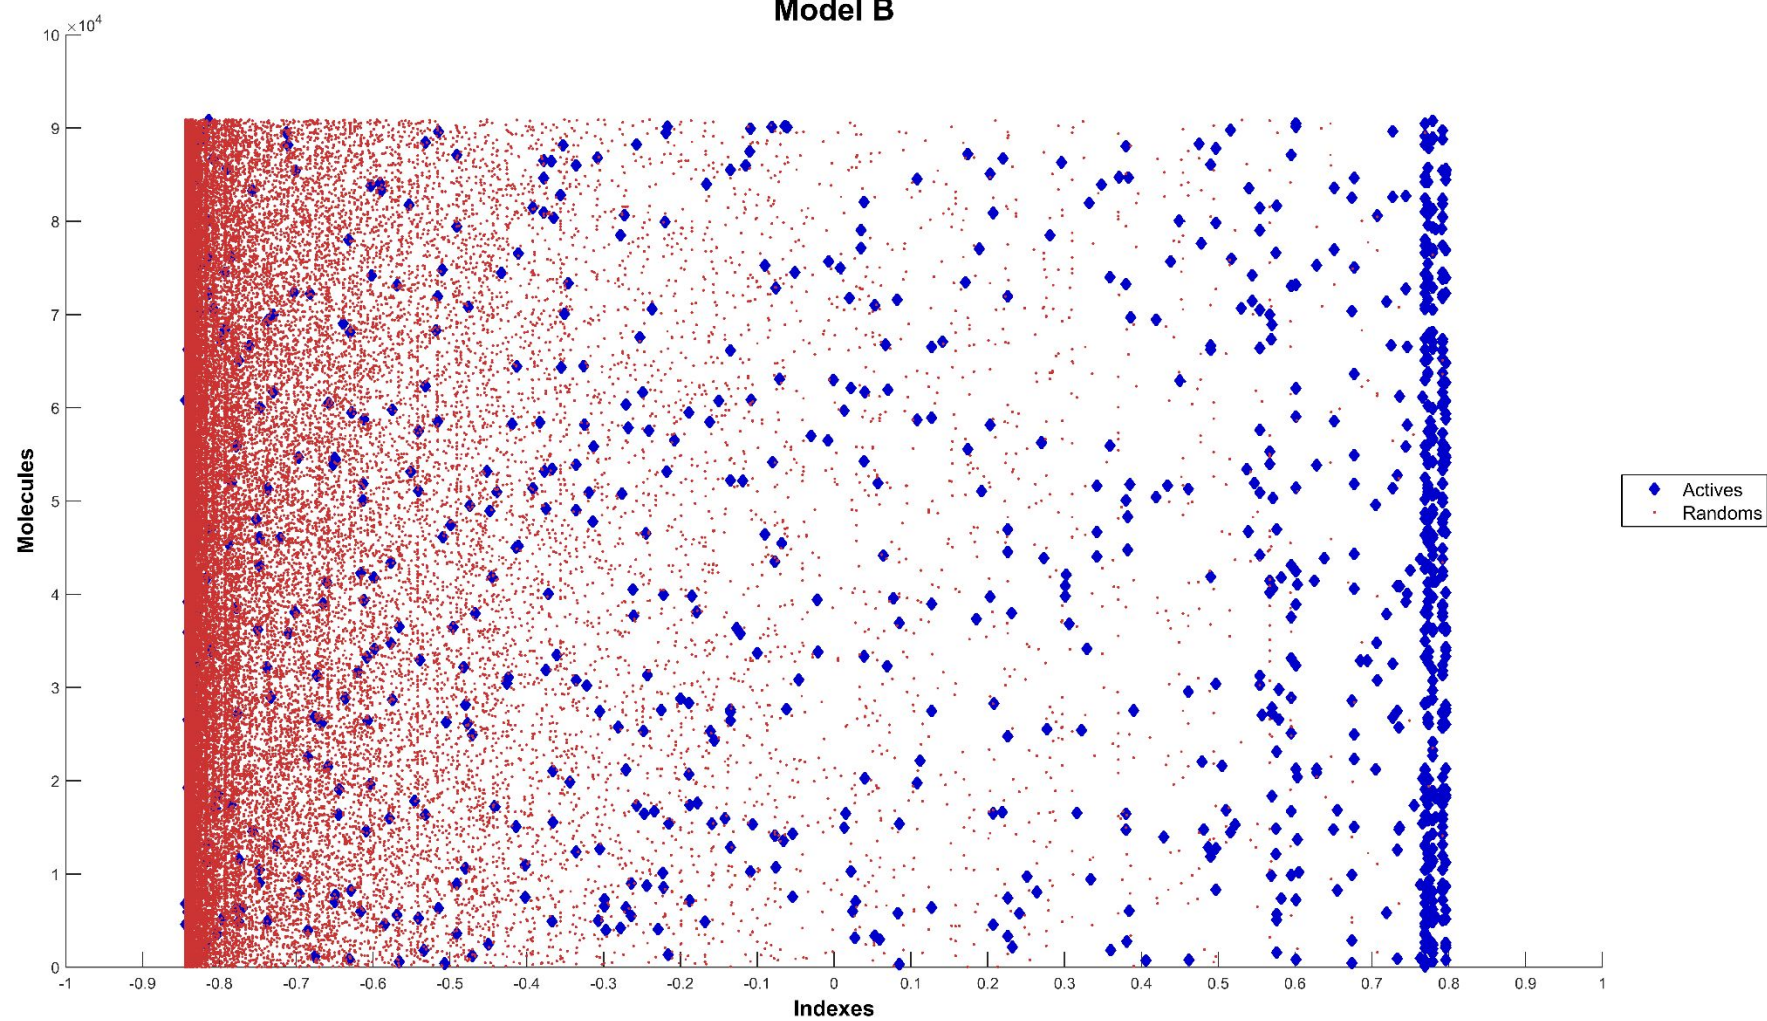



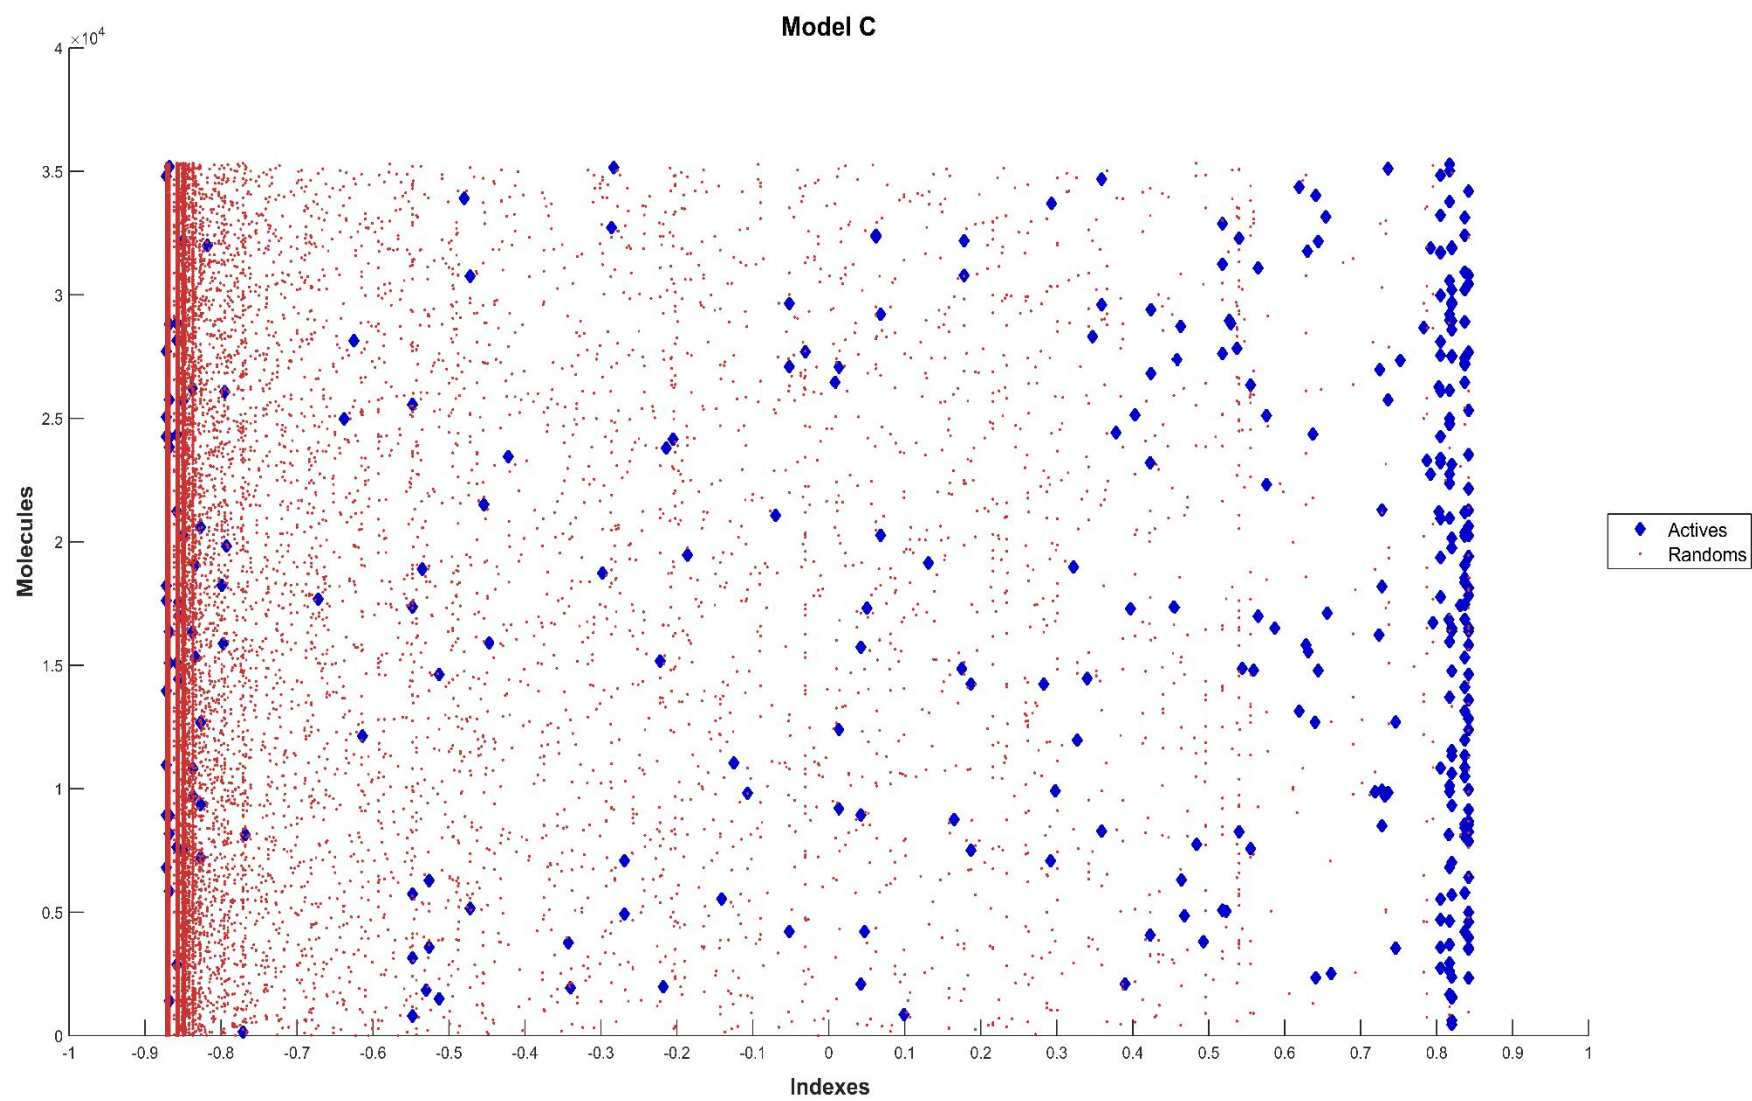

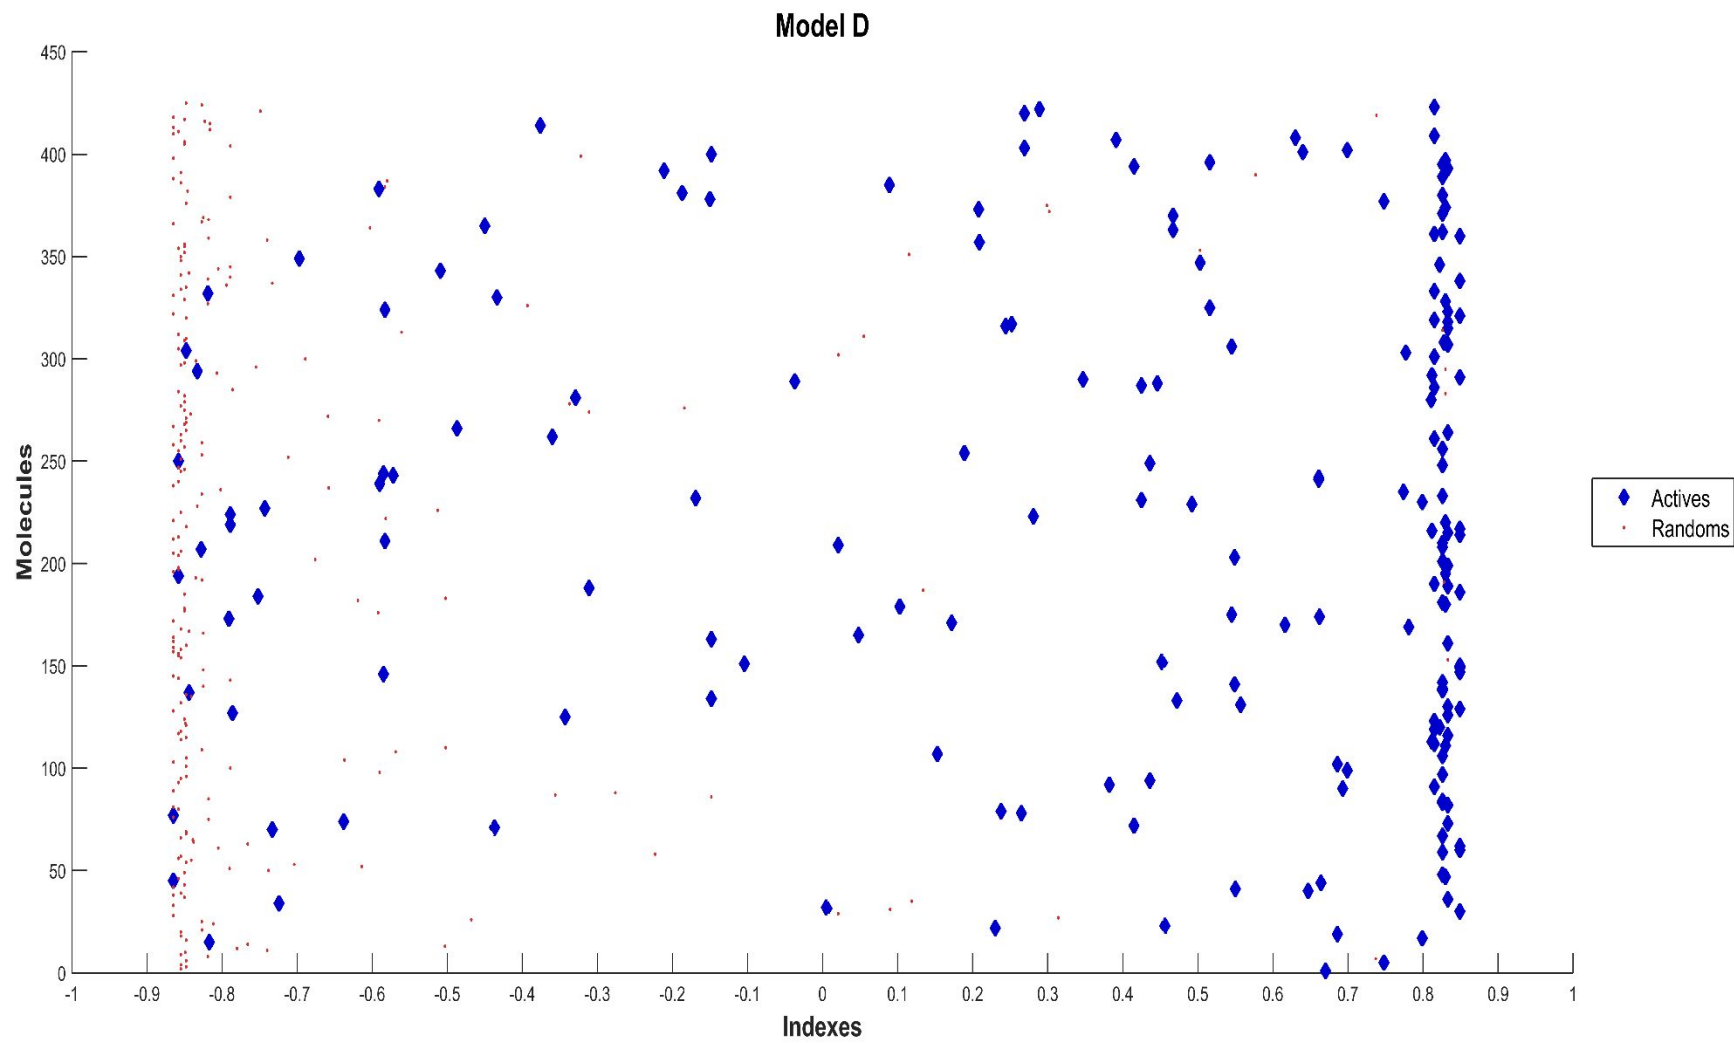

Figure S3 – Tanimoto coefficient distribution of the learning sets for models A-D

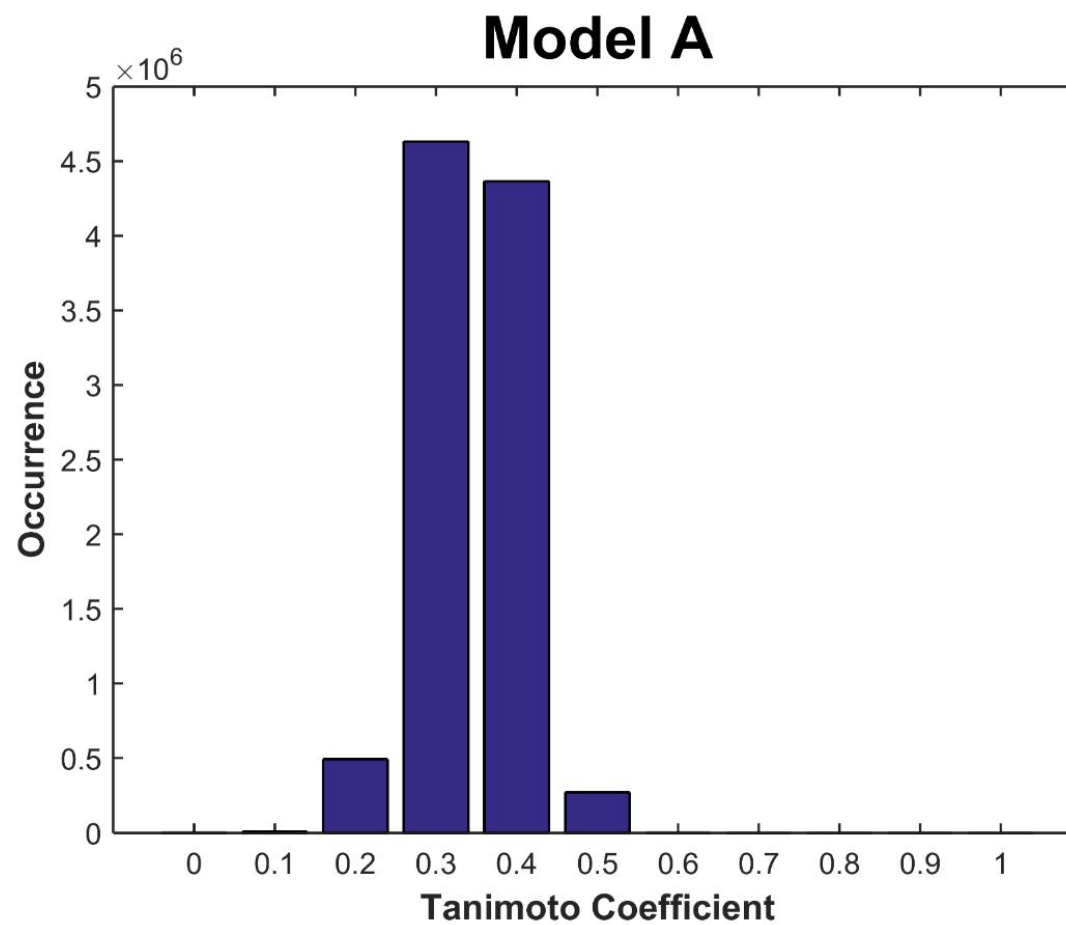

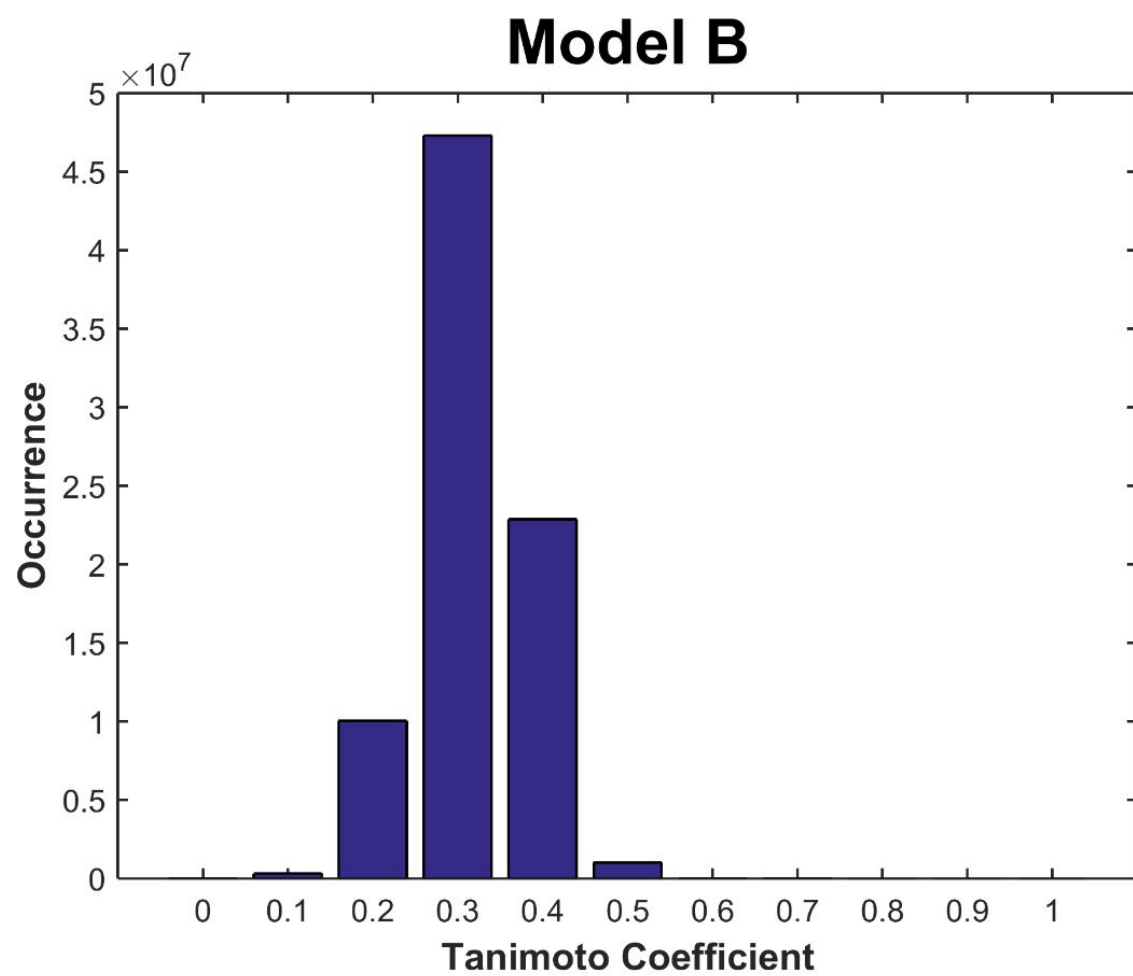

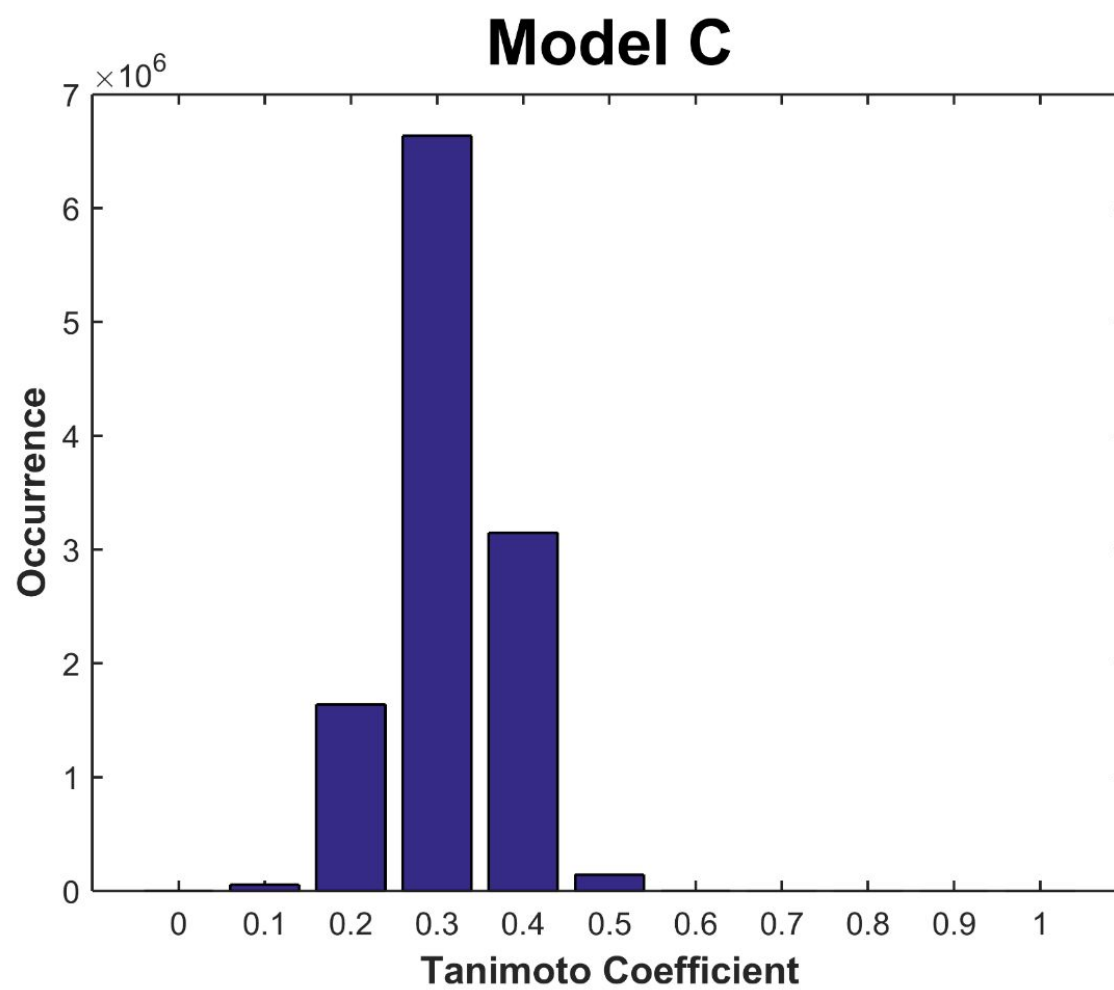

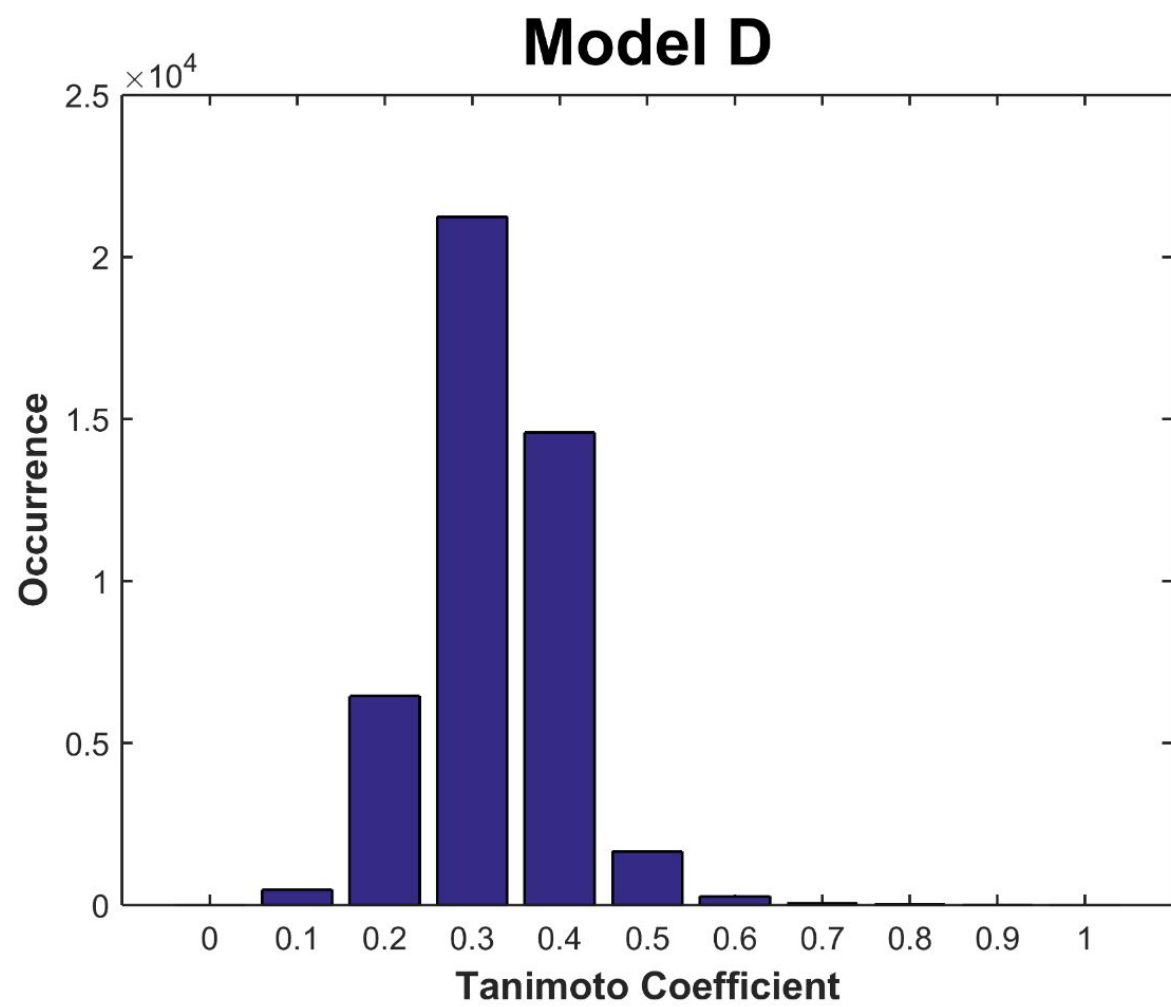

Figure S4 – The Applicability domain for models A-D and the test set

**Model A**

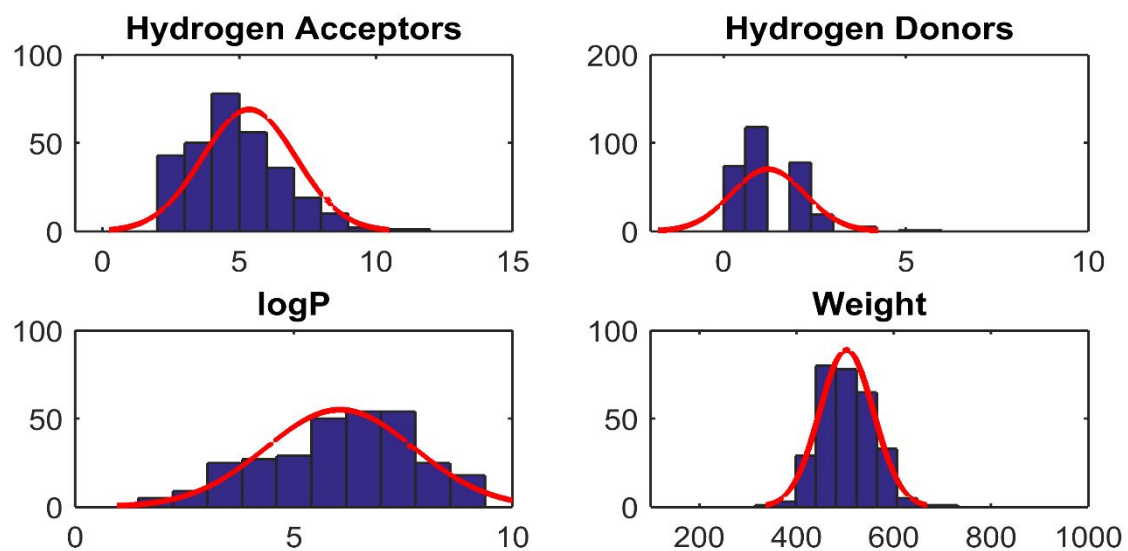

## Model B

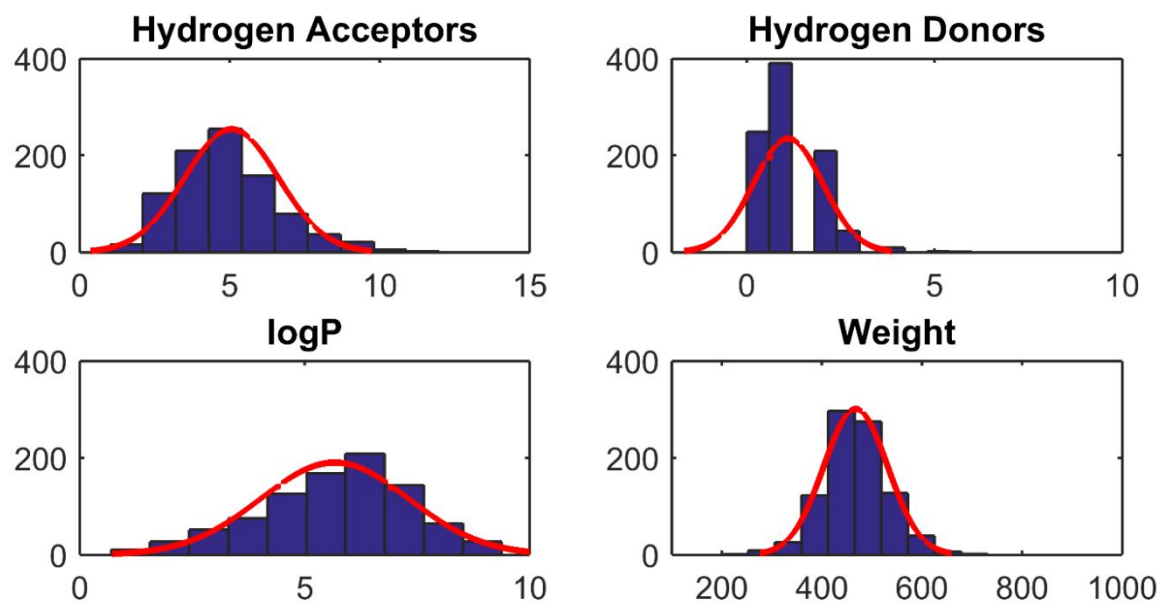



## Model C

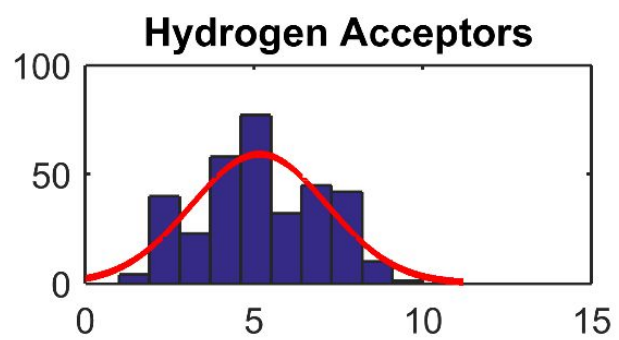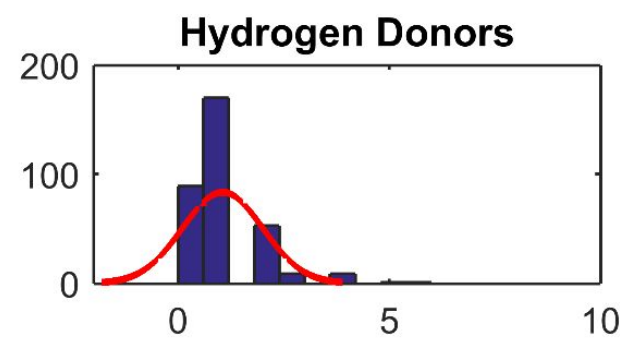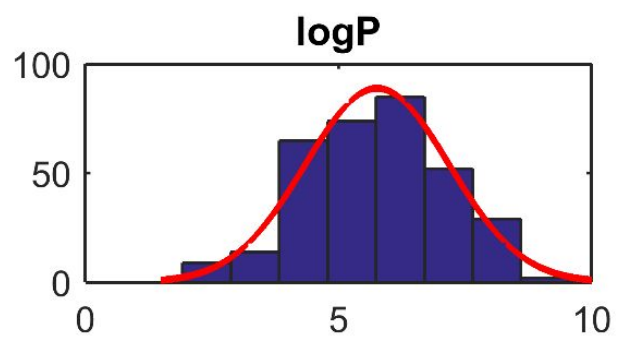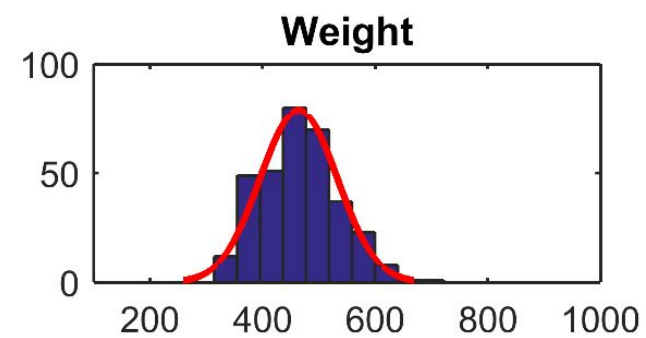

## Model D

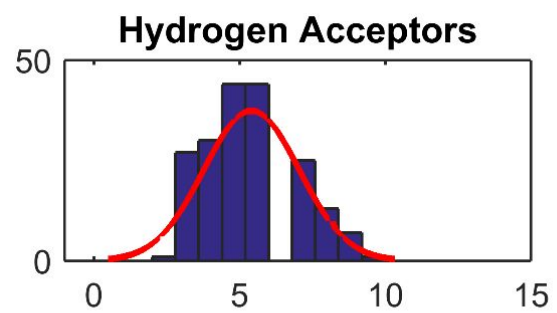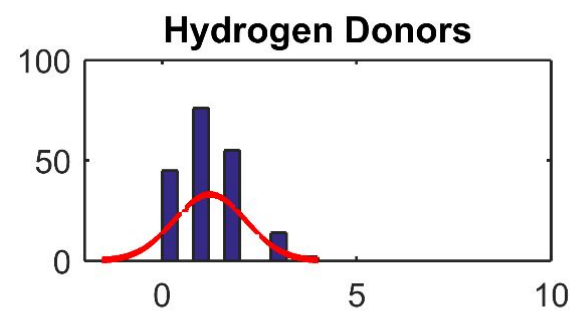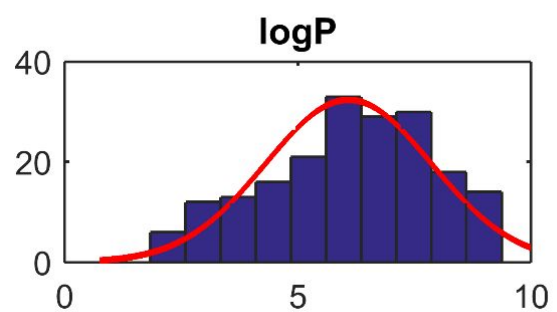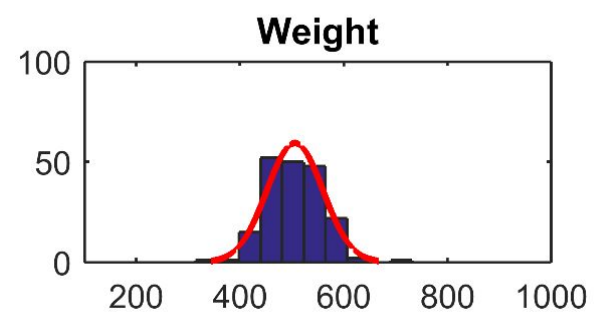

## Test set

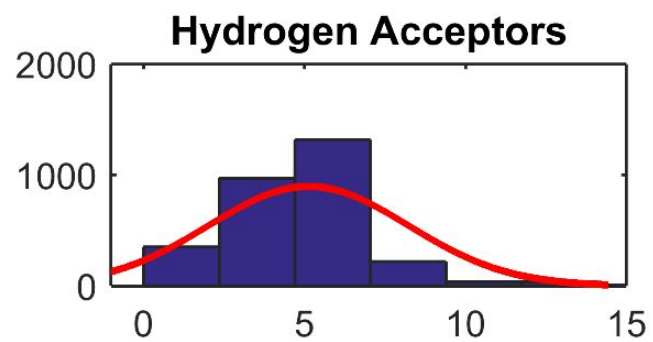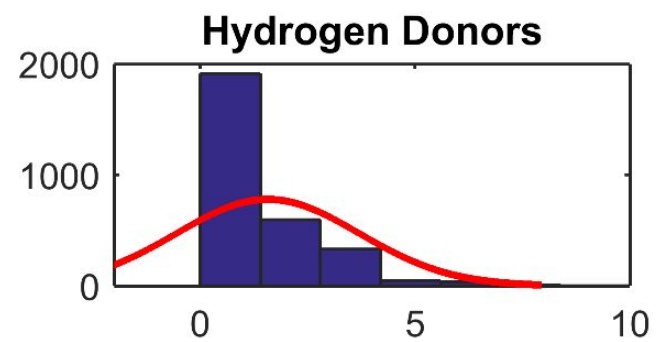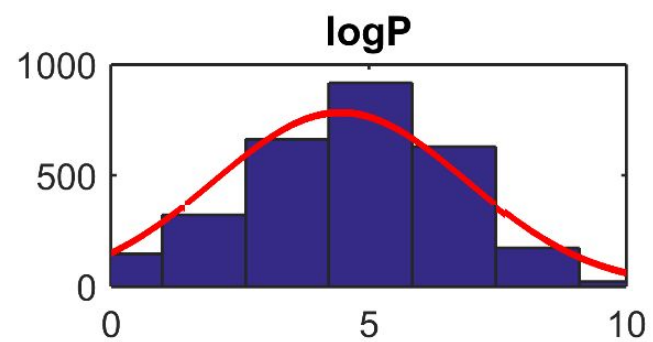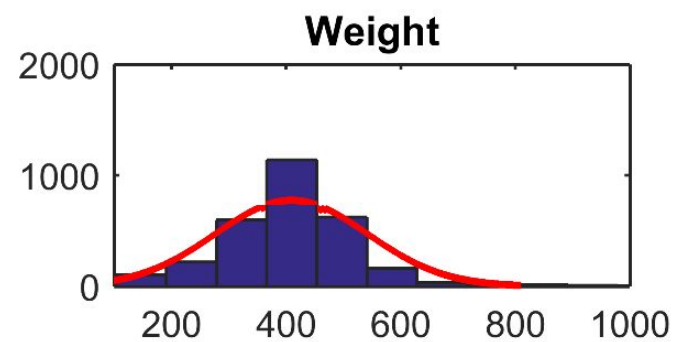

## Figure S5 – Distribution of some properties of the 498 hits

The average  $\pm$  2 STD for the properties used as peripheral filters.

|           | Hydrogen<br>Acceptors | Hydrogen<br>Donors | LogP | Molecular<br>Weight | PSA   |
|-----------|-----------------------|--------------------|------|---------------------|-------|
| Min range | 1                     | 0                  | 3.99 | 435                 | 26.98 |
| Max range | 4                     | 3                  | 8.48 | 518                 | 94.29 |

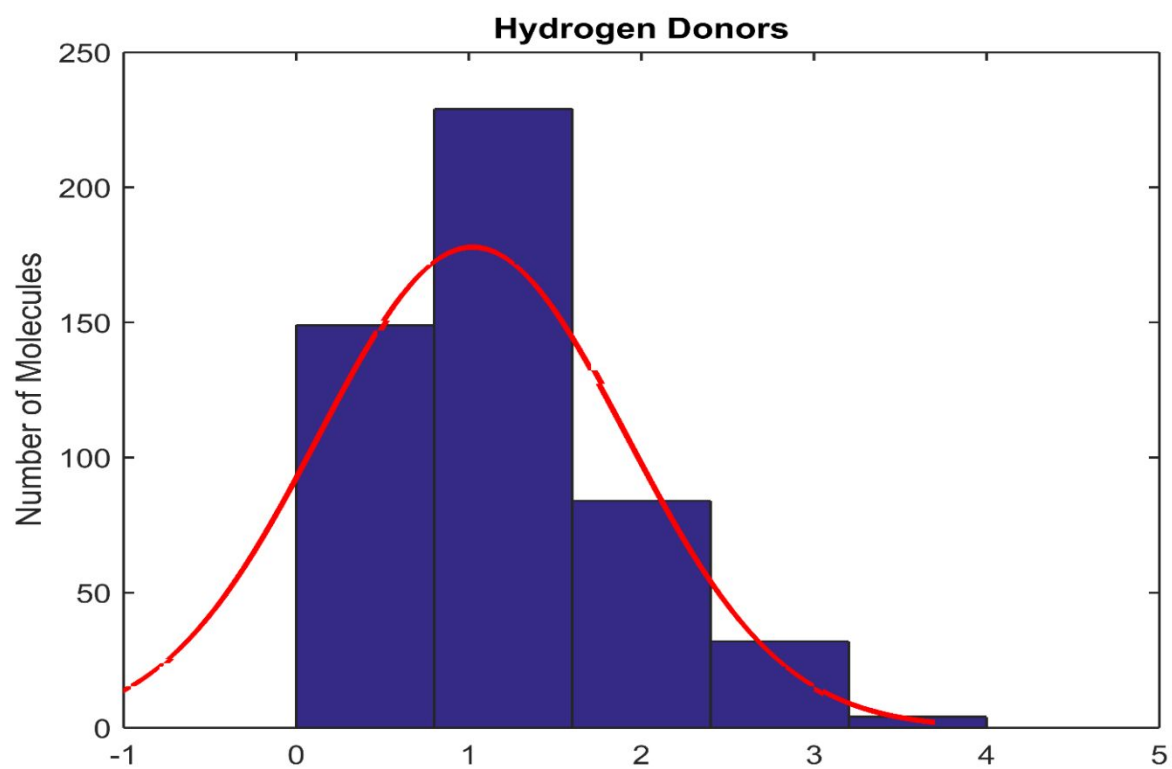

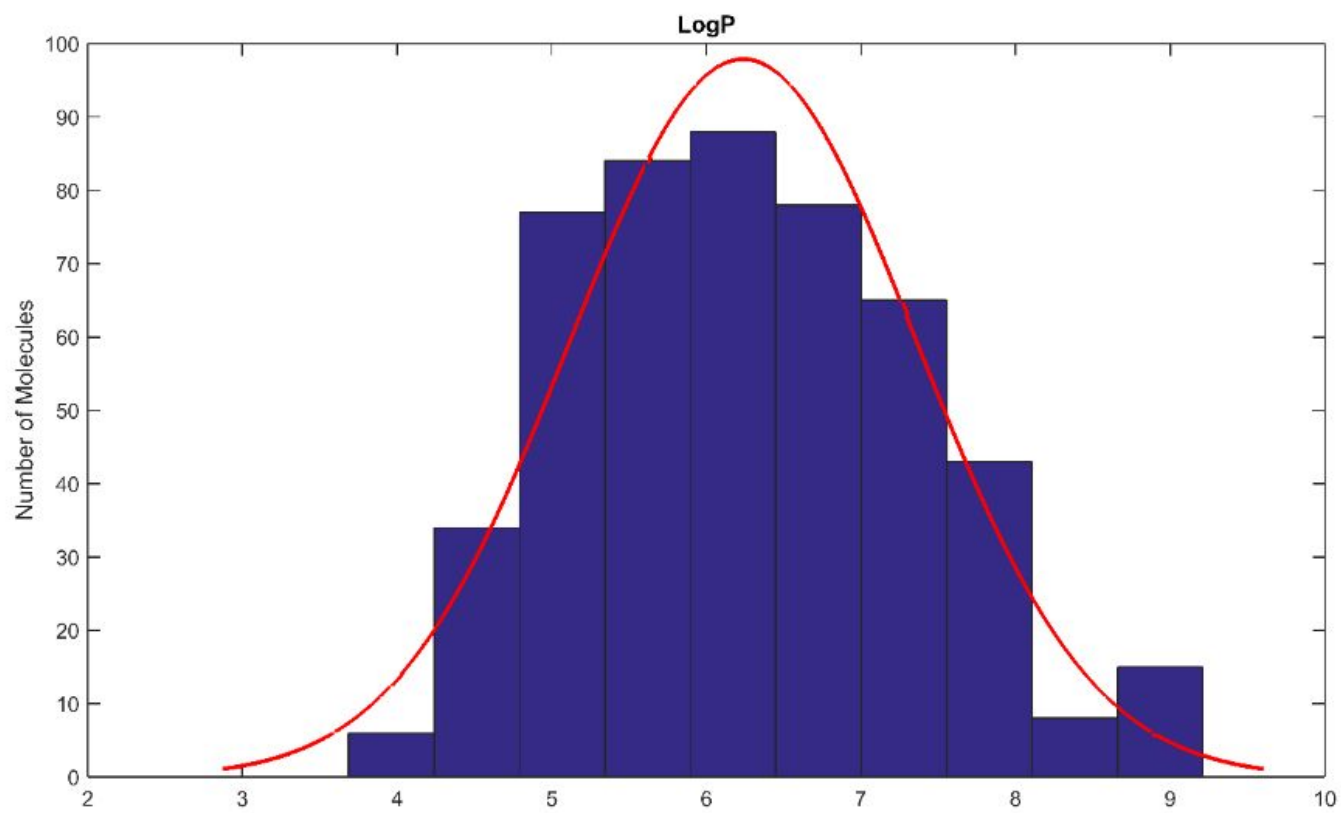

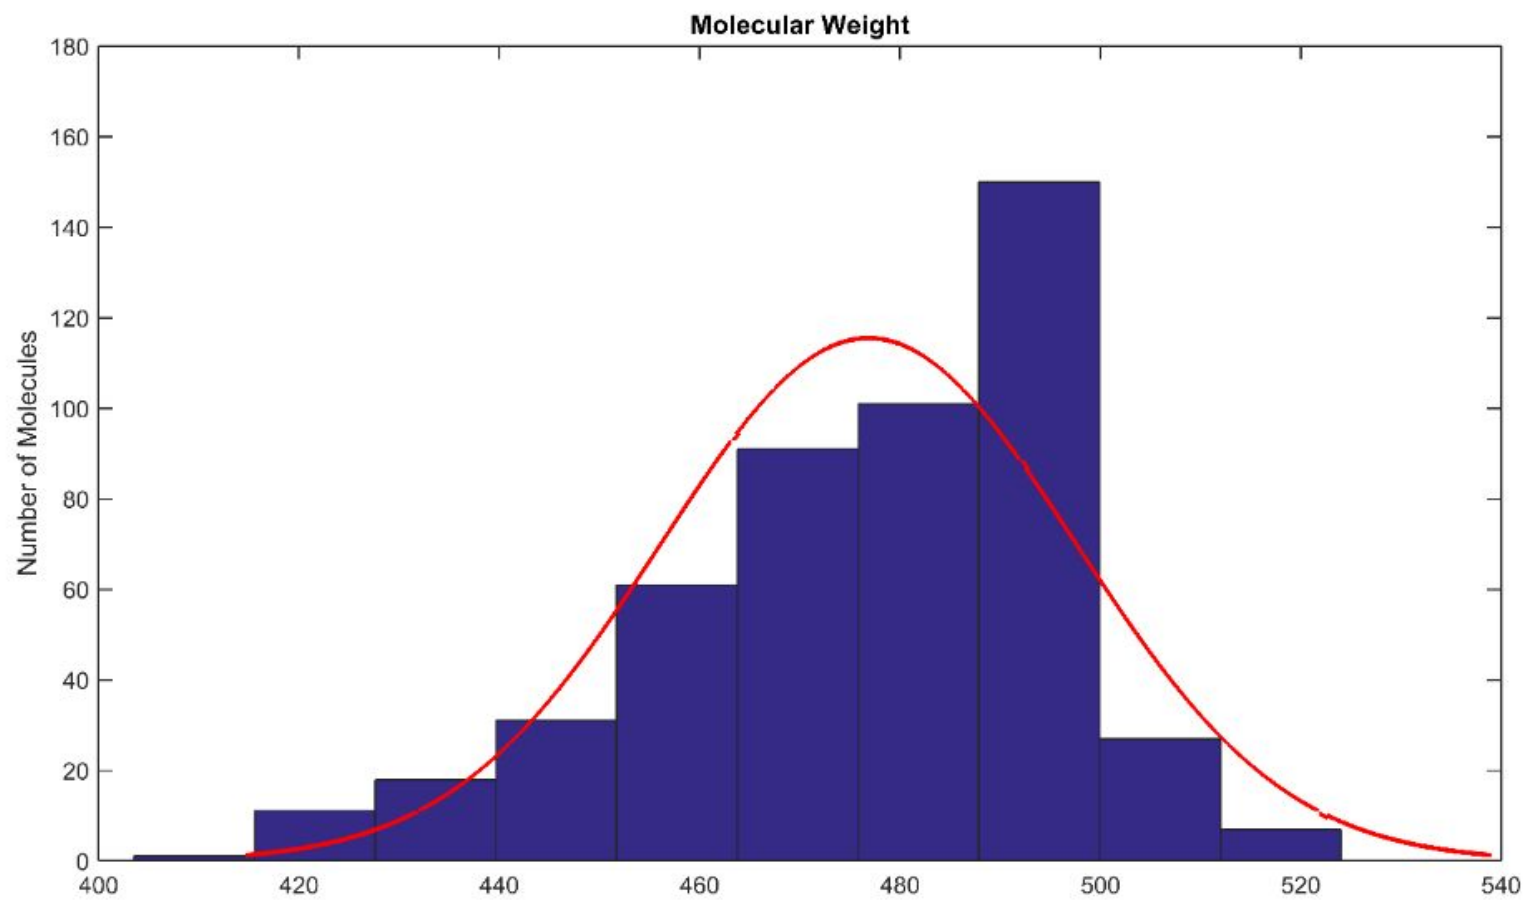

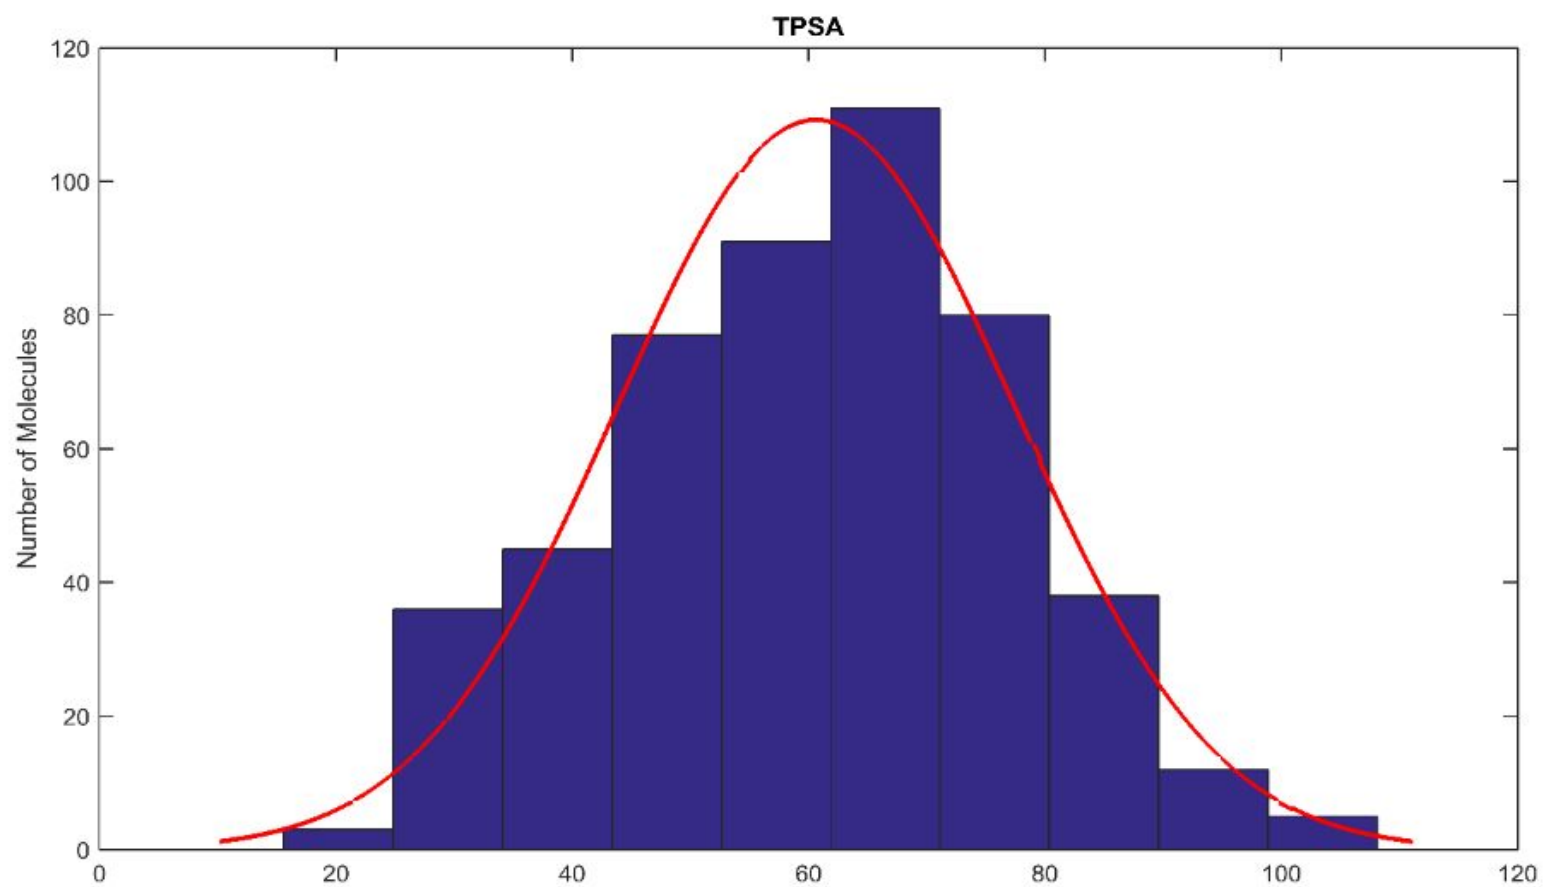

# Figure S6 – Hit map for screening 15 hits through GPCRs activity models

The bars show the index (ranges from -1 to 1) in each activity model for the 15 hits from VS.

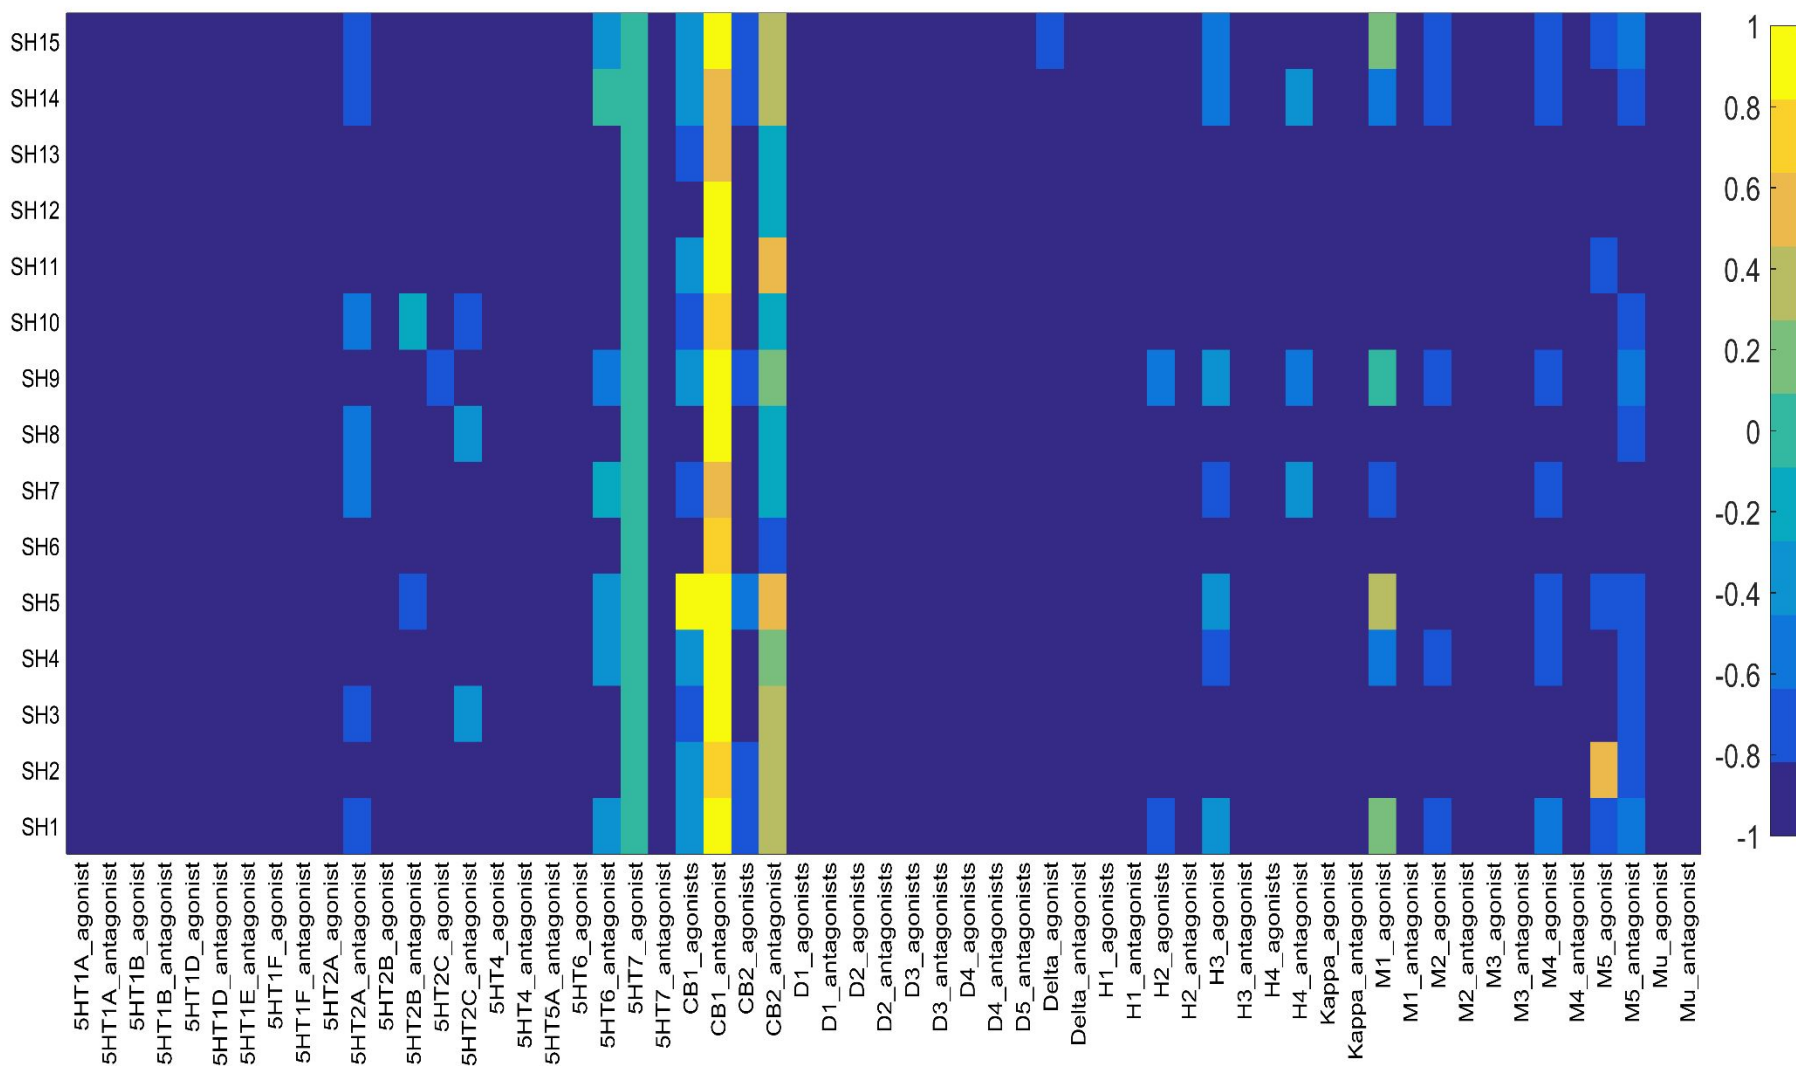

Supplement: Supplementary file 1 [file 17502212]
